# Supplementary material for: Temporal Trends and Disparities in Hepatitis-B Mortality in the United States Between 1999-2020: A CDC WONDER Study
Source: Research Square preprint supplement (doi:10.21203/rs.3.rs-7412047/v1), 2025-09-16
Supplement: Supplementary file 1 [file 0903fea6db1004cf6fdd5b19.docx]

**Index**

**Supplemental Table 1: Hepatitis** B **- Related Deaths, Stratified by Sex and Race in the United States, 1999 to 2020**

**Supplemental Table 2: Hepatitis** B **- Related Deaths, Stratified by Place of Death in the United States, 1999 to 2020**

**Supplemental Table 3: Annual Percent Change (APC) and Average Annual Percent Change (AAPC) of Hepatitis** B **-Related Age-Adjusted Mortality Rates per 100,000 in the United States, 1999 to 2020**

**Supplemental Table 4: Overall and Sex‐Stratified Hepatitis** B **-Related Age-Adjusted Mortality Rates per 100,000 in the United States, 1999 to 2020**

**Supplemental Table 5: Hepatitis -Related Crude Mortality Rates per 100,000, Stratified by Age Groups in the United States, 1999 to 2020**

**Supplemental Table 6: Hepatitis** B **-Related Age-Adjusted Mortality Rates per 100,000, Stratified by Race in the United States, 1999 to 2020**

**Supplemental Table 7: Hepatitis** B **-Related Age-Adjusted Mortality Rates per 100,000, Stratified by Census Region in the United States, 1999 to 2020**

**Supplemental Table 8: Hepatitis** B **-Related Age-Adjusted Mortality Rates per 100,000, Stratified by States in the United States, 1999 to 2020**

**Supplemental Table 9: Hepatitis** B **-Related Age-Adjusted Mortality Rates per 100,000 in the United States, Stratified by Urban-Rural Classification, 1999 to 2020**

**Supplemental Table 1: Hepatitis** B **- Related Deaths, Stratified by Sex and Race in the United States, 1999 to 2020**

| **Year** | **Total Deaths** | | | | | | | **Total population** |
| --- | --- | --- | --- | --- | --- | --- | --- | --- |
| **Overall** | **Male** | **Female** | **NH Asian or Pacific Islander** | **NH Black or African American** | **NH White** | **Hispanic** |
| 1999 | 1967 | 1461 | 506 | 246 | 409 | 1058 | 229 | 180408769 |
| 2000 | 1879 | 1368 | 511 | 304 | 360 | 1014 | 178 | 181984640 |
| 2001 | 1838 | 1394 | 444 | 296 | 373 | 954 | 193 | 184305128 |
| 2002 | 1884 | 1368 | 516 | 318 | 368 | 968 | 205 | 186208028 |
| 2003 | 1731 | 1265 | 466 | 283 | 351 | 909 | 166 | 188090429 |
| 2004 | 1678 | 1256 | 422 | 295 | 380 | 813 | 168 | 190205384 |
| 2005 | 1717 | 1247 | 470 | 309 | 334 | 904 | 150 | 192551384 |
| 2006 | 1691 | 1245 | 446 | 333 | 335 | 852 | 152 | 195019359 |
| 2007 | 1795 | 1334 | 461 | 357 | 350 | 919 | 154 | 197403777 |
| 2008 | 1775 | 1303 | 472 | 348 | 321 | 931 | 159 | 199795090 |
| 2009 | 1688 | 1260 | 428 | 378 | 311 | 820 | 158 | 202107016 |
| 2010 | 1784 | 1310 | 474 | 416 | 355 | 853 | 138 | 203891983 |
| 2011 | 1792 | 1311 | 481 | 420 | 371 | 827 | 158 | 206592936 |
| 2012 | 1756 | 1260 | 496 | 460 | 321 | 813 | 143 | 208826037 |
| 2013 | 1863 | 1371 | 492 | 445 | 383 | 866 | 149 | 211085314 |
| 2014 | 1837 | 1301 | 536 | 475 | 330 | 851 | 156 | 213809280 |
| 2015 | 1702 | 1267 | 435 | 418 | 317 | 803 | 136 | 216553817 |
| 2016 | 1689 | 1230 | 459 | 453 | 315 | 767 | 128 | 218641417 |
| 2017 | 1725 | 1274 | 451 | 492 | 319 | 775 | 109 | 221447331 |
| 2018 | 1648 | 1190 | 458 | 439 | 303 | 760 | 122 | 223311190 |
| 2019 | 1659 | 1246 | 413 | 463 | 288 | 761 | 117 | 224981167 |
| 2020 | 1747 | 1275 | 472 | 541 | 306 | 743 | 131 | 226635013 |
| Total | 38845 | 28536 | 10309 | 8489 | 7500 | 18961 | 3399 |  |

NH= Non-Hispanic

**Supplemental Table 2: Hepatitis** B **- Related Deaths, Stratified by Place of Death in the United States, 1999 to 2020**

| **Place of Death** | **Deaths** | **% of Deaths** |
| --- | --- | --- |
| **Medical Facility** | 22787 | 58.66% |
| **Decedent's home** | 8903 | 22.92% |
| **Hospice facility** | 2229 | 5.74% |
| **Nursing home/long term care** | 3204 | 8.25% |
| **Other** | 1629 | 4.19% |
| **Place of death unknown** | 93 | 0.24% |
| **Total** | 38845 | 100.00% |

**Supplemental Table 3: Annual Percent Change (APC) and Average Annual Percent Change (AAPC) of Hepatitis** B **-Related Age-Adjusted Mortality Rates per 100,000 in the United States, 1999 to 2020**

| Year Interval | APC (95% CI) | AAPC (95% CI) |
| --- | --- | --- |
| **Overall** | | |
| 1999–2004 | -4.45* (-6.70 to -2.15) |  |
| 2004–2020 | -1.64* (-2.10 to -1.17) |  |
| 1999–2020 |  | -2.31* (-2.92 to -1.70) |
| **Female** | | |
| 1999–2020 | -2.13* (-2.65 to -1.59) |  |
| 1999–2020 |  | -2.13* (-2.65 to -1.59) |
| **Male** | | |
| 1999–2003 | -5.18* (-7.60 to -2.69) |  |
| 2003–2020 | -2.01* (-2.31 to -1.70) |  |
| 1999–2020 |  | -2.62* (-3.12 to -2.12) |
| **25-34 years** | | |
| 1999–2020 | -4.27* (-5.43 to -3.09) |  |
| 1999–2020 |  | -4.27* (-5.43 to -3.09) |
| **35-44 years** | | |
| 1999–2008 | -9.34* (-10.87 to -7.79) |  |
| 2008–2020 | -2.76* (-4.35 to -1.15) |  |
| 1999–2020 |  | -5.64 * (-6.67 to -4.59) |
| **45-54 years** | | |
| 1999–2020 | -4.84 * (-5.15 to -4.54) |  |
| 1999–2020 |  | -4.84* (-5.15 to -4.54) |
| **55-64 years** | | |
| 1999–2004 | -1.48 (-5.14 to 2.32) |  |
| 2004–2013 | 2.78* (1.20 to 4.38) |  |
| 2013–2020 | -6.54 * (-8.16 to -4.90) |  |
| 1999–2020 |  | -1.43* (-2.56 to -0.28) |
| **65-74 years** | | |
| 1999–2009 | -1.60* (-2.93 to -0.26) |  |
| 2009–2020 | 1.62* (0.62 to 2.63) |  |
| 1999–2020 |  | 0.07 (-0.69 to 0.85) |
| **75-84 years** | | |
| 1999–2020 | 0.09 (-0.50 to 0.68) |  |
| 1999–2020 |  | 0.09 (-0.50 to 0.68) |
| **Asian or Pacific Islander** | | |
| 1999–2020 | -1.50* (-2.03 to -0.97) |  |
| 1999–2020 |  | -1.50* (-2.03 to -0.97) |
| **Black or African American** |  |  |
| 1999–2020 | -3.31* (-3.78 to -2.84) |  |
| 1999–2020 |  | -3.31* (-3.78 to -2.84) |
| **White** | | |
| 1999–2020 | -2.91* (-3.29 to -2.54) |  |
| 1999–2020 |  | -2.91* (-3.29 to -2.54) |
| **Hispanic or Latino** | | |
| 1999–2020 | -6.43* (-7.02 to -5.84) |  |
| 1999–2020 |  | -6.43* (-7.02 to -5.84) |
| **Northeast** | | |
| 1999–2020 | -3.38* (-4.00 to -2.75) |  |
| 1999–2020 |  | -3.38* (-4.00 to -2.75) |
| **Midwest** | | |
| 1999–2020 | -1.19* (-1.76 to -0.62) |  |
| 1999–2020 |  | -1.19* (-1.76 to -0.62) |
| **South** | | |
| 1999–2004 | -6.01* (-9.02 to -2.91) |  |
| 2004–2020 | -1.37* (-1.95 to -0.79) |  |
| 1999–2020 |  | -2.50* (-3.31 to -1.68) |
| **West** | | |
| 1999–2003 | -5.06* (-8.48 to -1.51) |  |
| 2003–2014 | -1.20* (-2.11 to -0.28) |  |
| 2014–2018 | -7.80* (-13.06 to -2.21) |  |
| 2018–2020 | 7.56 (-4.89 to 21.63) |  |
| 1999–2020 |  | -2.44* (-4.02 to -0.84) |
| **Metro** | | |
| 1999–2005 | -4.53* (-5.87 to -3.16) |  |
| 2005–2013 | -1.08 (-2.18 to 0.03) |  |
| 2013–2020 | -3.42* (-4.69 to -2.13) |  |
| 1999–2020 |  | -2.86* (-3.51 to -2.20) |
| **Non metro** | | |
| 1999–2020 | -0.55 (-1.13 to 0.02) |  |
| 1999–2020 |  | -0.55 (-1.13 to 0.02) |

**Supplemental Table 4: Overall and Sex‐Stratified Hepatitis** B **-Related Age-Adjusted Mortality Rates per 100,000 in the United States, 1999 to 2020**

| **Year** | **Age-Adjusted Rate (95% CI)** | | |
| --- | --- | --- | --- |
| **Overall** | **Female** | **Male** |
| 1999 | 1.12 (1.07 to 1.17) | 0.56 (0.51 to 0.61) | 1.74 (1.65 to 1.83) |
| 2000 | 1.02 (0.98 to 1.07) | 0.53 (0.49 to 0.58) | 1.63 (1.54 to 1.71) |
| 2001 | 1 (0.95 to 1.05) | 0.46 (0.42 to 0.51) | 1.59 (1.51 to 1.68) |
| 2002 | 1.01 (0.96 to 1.05) | 0.52 (0.47 to 0.56) | 1.53 (1.45 to 1.61) |
| 2003 | 0.91 (0.87 to 0.95) | 0.46 (0.42 to 0.5) | 1.39 (1.31 to 1.47) |
| 2004 | 0.87 (0.83 to 0.91) | 0.39 (0.35 to 0.43) | 1.36 (1.28 to 1.43) |
| 2005 | 0.86 (0.82 to 0.9) | 0.45 (0.41 to 0.49) | 1.34 (1.26 to 1.41) |
| 2006 | 0.82 (0.78 to 0.86) | 0.39 (0.35 to 0.43) | 1.32 (1.24 to 1.39) |
| 2007 | 0.83 (0.8 to 0.87) | 0.42 (0.38 to 0.46) | 1.34 (1.27 to 1.41) |
| 2008 | 0.84 (0.8 to 0.88) | 0.44 (0.4 to 0.48) | 1.3 (1.22 to 1.37) |
| 2009 | 0.75 (0.72 to 0.79) | 0.37 (0.33 to 0.41) | 1.19 (1.12 to 1.25) |
| 2010 | 0.8 (0.76 to 0.84) | 0.42 (0.38 to 0.46) | 1.26 (1.19 to 1.33) |
| 2011 | 0.78 (0.74 to 0.82) | 0.41 (0.37 to 0.45) | 1.19 (1.13 to 1.26) |
| 2012 | 0.78 (0.74 to 0.82) | 0.39 (0.36 to 0.43) | 1.15 (1.08 to 1.21) |
| 2013 | 0.82 (0.78 to 0.86) | 0.4 (0.36 to 0.43) | 1.22 (1.16 to 1.29) |
| 2014 | 0.77 (0.73 to 0.8) | 0.42 (0.38 to 0.45) | 1.14 (1.08 to 1.2) |
| 2015 | 0.72 (0.68 to 0.75) | 0.33 (0.3 to 0.36) | 1.09 (1.02 to 1.15) |
| 2016 | 0.7 (0.67 to 0.74) | 0.33 (0.3 to 0.36) | 1.04 (0.98 to 1.1) |
| 2017 | 0.72 (0.68 to 0.75) | 0.35 (0.32 to 0.38) | 1.08 (1.02 to 1.14) |
| 2018 | 0.66 (0.63 to 0.7) | 0.34 (0.31 to 0.37) | 1.01 (0.95 to 1.07) |
| 2019 | 0.65 (0.61 to 0.68) | 0.33 (0.3 to 0.37) | 1.02 (0.96 to 1.08) |
| 2020 | 0.69 (0.66 to 0.72) | 0.34 (0.31 to 0.37) | 1.02 (0.97 to 1.08) |
| Overall | 0.82 (0.81 to 0.83) | 0.41 (0.4 to 0.42) | 1.28 (1.26 to 1.29) |

**Supplemental Table 5: Hepatitis -Related Crude Mortality Rates per 100,000, Stratified by Age Groups in the United States, 1999 to 2020**

| Ten-Year Age Groups | Year | Crude Rate (95% CI) |
| --- | --- | --- |
| 25-34 years | 1999 | 0.19 (0.15 to 0.24) |
| 25-34 years | 2000 | 0.13 (0.1 to 0.17) |
| 25-34 years | 2001 | 0.11 (0.08 to 0.15) |
| 25-34 years | 2002 | 0.17 (0.13 to 0.21) |
| 25-34 years | 2003 | 0.12 (0.09 to 0.16) |
| 25-34 years | 2004 | 0.16 (0.12 to 0.2) |
| 25-34 years | 2005 | 0.14 (0.1 to 0.18) |
| 25-34 years | 2006 | 0.1 (0.07 to 0.14) |
| 25-34 years | 2007 | 0.13 (0.1 to 0.17) |
| 25-34 years | 2008 | 0.1 (0.07 to 0.13) |
| 25-34 years | 2009 | 0.08 (0.06 to 0.12) |
| 25-34 years | 2010 | 0.1 (0.08 to 0.14) |
| 25-34 years | 2011 | 0.09 (0.06 to 0.12) |
| 25-34 years | 2012 | 0.08 (0.05 to 0.11) |
| 25-34 years | 2013 | 0.08 (0.06 to 0.12) |
| 25-34 years | 2014 | 0.08 (0.06 to 0.11) |
| 25-34 years | 2015 | 0.06 (0.04 to 0.09) |
| 25-34 years | 2016 | 0.09 (0.06 to 0.12) |
| 25-34 years | 2017 | 0.06 (0.04 to 0.09) |
| 25-34 years | 2018 | 0.07 (0.05 to 0.1) |
| 25-34 years | 2019 | 0.09 (0.07 to 0.12) |
| 25-34 years | 2020 | 0.07 (0.05 to 0.1) |
| 35-44 years | 1999 | 0.98 (0.88 to 1.07) |
| 35-44 years | 2000 | 0.73 (0.65 to 0.81) |
| 35-44 years | 2001 | 0.68 (0.6 to 0.75) |
| 35-44 years | 2002 | 0.7 (0.62 to 0.77) |
| 35-44 years | 2003 | 0.58 (0.51 to 0.65) |
| 35-44 years | 2004 | 0.5 (0.43 to 0.57) |
| 35-44 years | 2005 | 0.53 (0.46 to 0.59) |
| 35-44 years | 2006 | 0.44 (0.38 to 0.51) |
| 35-44 years | 2007 | 0.42 (0.36 to 0.48) |
| 35-44 years | 2008 | 0.36 (0.3 to 0.41) |
| 35-44 years | 2009 | 0.34 (0.29 to 0.4) |
| 35-44 years | 2010 | 0.35 (0.29 to 0.4) |
| 35-44 years | 2011 | 0.35 (0.29 to 0.41) |
| 35-44 years | 2012 | 0.3 (0.25 to 0.35) |
| 35-44 years | 2013 | 0.36 (0.3 to 0.42) |
| 35-44 years | 2014 | 0.31 (0.26 to 0.37) |
| 35-44 years | 2015 | 0.29 (0.24 to 0.34) |
| 35-44 years | 2016 | 0.29 (0.23 to 0.34) |
| 35-44 years | 2017 | 0.26 (0.21 to 0.31) |
| 35-44 years | 2018 | 0.3 (0.24 to 0.35) |
| 35-44 years | 2019 | 0.26 (0.21 to 0.31) |
| 35-44 years | 2020 | 0.26 (0.21 to 0.31) |
| 45-54 years | 1999 | 1.77 (1.63 to 1.91) |
| 45-54 years | 2000 | 1.64 (1.51 to 1.77) |
| 45-54 years | 2001 | 1.59 (1.47 to 1.72) |
| 45-54 years | 2002 | 1.71 (1.58 to 1.84) |
| 45-54 years | 2003 | 1.46 (1.35 to 1.58) |
| 45-54 years | 2004 | 1.35 (1.24 to 1.47) |
| 45-54 years | 2005 | 1.28 (1.17 to 1.39) |
| 45-54 years | 2006 | 1.22 (1.11 to 1.32) |
| 45-54 years | 2007 | 1.21 (1.11 to 1.31) |
| 45-54 years | 2008 | 1.2 (1.09 to 1.3) |
| 45-54 years | 2009 | 1.04 (0.95 to 1.14) |
| 45-54 years | 2010 | 1 (0.9 to 1.09) |
| 45-54 years | 2011 | 0.94 (0.85 to 1.03) |
| 45-54 years | 2012 | 0.96 (0.87 to 1.05) |
| 45-54 years | 2013 | 0.89 (0.8 to 0.97) |
| 45-54 years | 2014 | 0.88 (0.8 to 0.97) |
| 45-54 years | 2015 | 0.76 (0.68 to 0.85) |
| 45-54 years | 2016 | 0.76 (0.67 to 0.84) |
| 45-54 years | 2017 | 0.76 (0.68 to 0.85) |
| 45-54 years | 2018 | 0.68 (0.6 to 0.76) |
| 45-54 years | 2019 | 0.62 (0.55 to 0.7) |
| 45-54 years | 2020 | 0.67 (0.59 to 0.75) |
| 55-64 years | 1999 | 1.39 (1.24 to 1.54) |
| 55-64 years | 2000 | 1.5 (1.35 to 1.65) |
| 55-64 years | 2001 | 1.53 (1.38 to 1.68) |
| 55-64 years | 2002 | 1.42 (1.28 to 1.57) |
| 55-64 years | 2003 | 1.32 (1.19 to 1.46) |
| 55-64 years | 2004 | 1.34 (1.21 to 1.48) |
| 55-64 years | 2005 | 1.39 (1.26 to 1.52) |
| 55-64 years | 2006 | 1.37 (1.24 to 1.5) |
| 55-64 years | 2007 | 1.64 (1.5 to 1.78) |
| 55-64 years | 2008 | 1.53 (1.39 to 1.66) |
| 55-64 years | 2009 | 1.54 (1.41 to 1.67) |
| 55-64 years | 2010 | 1.66 (1.53 to 1.8) |
| 55-64 years | 2011 | 1.69 (1.56 to 1.82) |
| 55-64 years | 2012 | 1.65 (1.53 to 1.78) |
| 55-64 years | 2013 | 1.78 (1.65 to 1.91) |
| 55-64 years | 2014 | 1.7 (1.57 to 1.83) |
| 55-64 years | 2015 | 1.49 (1.37 to 1.61) |
| 55-64 years | 2016 | 1.39 (1.28 to 1.5) |
| 55-64 years | 2017 | 1.3 (1.2 to 1.41) |
| 55-64 years | 2018 | 1.23 (1.12 to 1.34) |
| 55-64 years | 2019 | 1.18 (1.08 to 1.29) |
| 55-64 years | 2020 | 1.14 (1.04 to 1.24) |
| 65-74 years | 1999 | 1.42 (1.25 to 1.59) |
| 65-74 years | 2000 | 1.58 (1.4 to 1.76) |
| 65-74 years | 2001 | 1.49 (1.31 to 1.67) |
| 65-74 years | 2002 | 1.21 (1.05 to 1.37) |
| 65-74 years | 2003 | 1.39 (1.22 to 1.56) |
| 65-74 years | 2004 | 1.3 (1.14 to 1.47) |
| 65-74 years | 2005 | 1.27 (1.11 to 1.43) |
| 65-74 years | 2006 | 1.41 (1.24 to 1.57) |
| 65-74 years | 2007 | 1.34 (1.17 to 1.5) |
| 65-74 years | 2008 | 1.32 (1.16 to 1.47) |
| 65-74 years | 2009 | 1.19 (1.04 to 1.34) |
| 65-74 years | 2010 | 1.36 (1.21 to 1.52) |
| 65-74 years | 2011 | 1.26 (1.11 to 1.41) |
| 65-74 years | 2012 | 1.3 (1.16 to 1.45) |
| 65-74 years | 2013 | 1.36 (1.21 to 1.5) |
| 65-74 years | 2014 | 1.35 (1.21 to 1.49) |
| 65-74 years | 2015 | 1.39 (1.25 to 1.53) |
| 65-74 years | 2016 | 1.34 (1.2 to 1.47) |
| 65-74 years | 2017 | 1.4 (1.27 to 1.54) |
| 65-74 years | 2018 | 1.38 (1.25 to 1.52) |
| 65-74 years | 2019 | 1.54 (1.4 to 1.67) |
| 65-74 years | 2020 | 1.52 (1.39 to 1.65) |
| 75-84 years | 1999 | 1.37 (1.17 to 1.58) |
| 75-84 years | 2000 | 1.52 (1.3 to 1.74) |
| 75-84 years | 2001 | 1.27 (1.07 to 1.47) |
| 75-84 years | 2002 | 1.36 (1.15 to 1.56) |
| 75-84 years | 2003 | 1.24 (1.05 to 1.43) |
| 75-84 years | 2004 | 1.19 (1.01 to 1.38) |
| 75-84 years | 2005 | 1.24 (1.05 to 1.43) |
| 75-84 years | 2006 | 1.3 (1.1 to 1.49) |
| 75-84 years | 2007 | 1.44 (1.23 to 1.64) |
| 75-84 years | 2008 | 1.49 (1.28 to 1.7) |
| 75-84 years | 2009 | 1.43 (1.22 to 1.63) |
| 75-84 years | 2010 | 1.42 (1.22 to 1.63) |
| 75-84 years | 2011 | 1.47 (1.27 to 1.68) |
| 75-84 years | 2012 | 1.26 (1.07 to 1.45) |
| 75-84 years | 2013 | 1.38 (1.18 to 1.58) |
| 75-84 years | 2014 | 1.28 (1.09 to 1.47) |
| 75-84 years | 2015 | 1.21 (1.02 to 1.39) |
| 75-84 years | 2016 | 1.3 (1.11 to 1.49) |
| 75-84 years | 2017 | 1.48 (1.28 to 1.67) |
| 75-84 years | 2018 | 1.3 (1.12 to 1.48) |
| 75-84 years | 2019 | 1.22 (1.05 to 1.39) |
| 75-84 years | 2020 | 1.57 (1.38 to 1.76) |
| 85+ years | 1999 | 1.04 (0.75 to 1.39) |
| 85+ years | 2000 | 0.92 (0.65 to 1.26) |
| 85+ years | 2001 | 1 (0.72 to 1.34) |
| 85+ years | 2002 | 1.08 (0.79 to 1.43) |
| 85+ years | 2003 | 0.96 (0.7 to 1.3) |
| 85+ years | 2004 | 0.92 (0.67 to 1.25) |
| 85+ years | 2005 | 1.36 (1.05 to 1.74) |
| 85+ years | 2006 | 1.15 (0.87 to 1.49) |
| 85+ years | 2007 | 0.71 (0.5 to 0.99) |
| 85+ years | 2008 | 1.29 (1 to 1.64) |
| 85+ years | 2009 | 1.1 (0.84 to 1.42) |
| 85+ years | 2010 | 1.13 (0.87 to 1.45) |
| 85+ years | 2011 | 1.27 (1 to 1.6) |
| 85+ years | 2012 | 1.04 (0.79 to 1.33) |
| 85+ years | 2013 | 1.06 (0.82 to 1.35) |
| 85+ years | 2014 | 1.28 (1.01 to 1.6) |
| 85+ years | 2015 | 1.08 (0.84 to 1.37) |
| 85+ years | 2016 | 1.05 (0.81 to 1.33) |
| 85+ years | 2017 | 1.33 (1.06 to 1.64) |
| 85+ years | 2018 | 1.07 (0.83 to 1.35) |
| 85+ years | 2019 | 1.07 (0.84 to 1.36) |
| 85+ years | 2020 | 1.53 (1.23 to 1.83) |

**Supplemental Table 6: Hepatitis** B **-Related Age-Adjusted Mortality Rates per 100,000, Stratified by Race in the United States, 1999 to 2020**

| **Year** | **Age-Adjusted Rate (95% CI)** | | | |
| --- | --- | --- | --- | --- |
| **NH Asian or Pacific Islander** | **NH Black or African American** | **NH White** | **Hispanic or Latino** |
| 1999 | 4.38 (3.81 to 4.95) | 2.25 (2.03 to 2.47) | 0.77 (0.72 to 0.81) | 1.72 (1.48 to 1.95) |
| 2000 | 5.24 (4.63 to 5.85) | 1.94 (1.74 to 2.15) | 0.75 (0.7 to 0.8) | 1.37 (1.16 to 1.59) |
| 2001 | 4.69 (4.14 to 5.24) | 1.98 (1.78 to 2.18) | 0.67 (0.63 to 0.71) | 1.39 (1.18 to 1.6) |
| 2002 | 4.91 (4.34 to 5.47) | 1.82 (1.63 to 2.01) | 0.69 (0.65 to 0.74) | 1.37 (1.17 to 1.57) |
| 2003 | 4.14 (3.64 to 4.64) | 1.72 (1.54 to 1.9) | 0.63 (0.58 to 0.67) | 1.01 (0.85 to 1.17) |
| 2004 | 4.17 (3.68 to 4.66) | 1.85 (1.66 to 2.04) | 0.56 (0.52 to 0.6) | 1 (0.85 to 1.16) |
| 2005 | 4.11 (3.63 to 4.58) | 1.56 (1.39 to 1.73) | 0.61 (0.57 to 0.65) | 0.86 (0.72 to 1.01) |
| 2006 | 4.26 (3.78 to 4.73) | 1.53 (1.37 to 1.7) | 0.57 (0.53 to 0.61) | 0.88 (0.73 to 1.03) |
| 2007 | 4.35 (3.89 to 4.82) | 1.55 (1.39 to 1.72) | 0.6 (0.56 to 0.64) | 0.81 (0.68 to 0.95) |
| 2008 | 4.08 (3.64 to 4.53) | 1.4 (1.24 to 1.56) | 0.59 (0.55 to 0.63) | 0.82 (0.69 to 0.95) |
| 2009 | 4.2 (3.76 to 4.64) | 1.3 (1.15 to 1.44) | 0.5 (0.46 to 0.53) | 0.81 (0.68 to 0.95) |
| 2010 | 4.5 (4.05 to 4.94) | 1.45 (1.29 to 1.6) | 0.52 (0.48 to 0.56) | 0.67 (0.55 to 0.79) |
| 2011 | 4.15 (3.74 to 4.56) | 1.53 (1.37 to 1.69) | 0.48 (0.45 to 0.51) | 0.73 (0.61 to 0.85) |
| 2012 | 4.44 (4.02 to 4.85) | 1.25 (1.11 to 1.39) | 0.48 (0.45 to 0.52) | 0.61 (0.5 to 0.71) |
| 2013 | 4.01 (3.63 to 4.39) | 1.51 (1.35 to 1.67) | 0.49 (0.46 to 0.53) | 0.57 (0.48 to 0.67) |
| 2014 | 4.16 (3.77 to 4.54) | 1.25 (1.11 to 1.38) | 0.51 (0.47 to 0.54) | 0.61 (0.51 to 0.71) |
| 2015 | 3.45 (3.11 to 3.79) | 1.17 (1.03 to 1.3) | 0.44 (0.41 to 0.47) | 0.5 (0.41 to 0.59) |
| 2016 | 3.68 (3.33 to 4.02) | 1.13 (1 to 1.26) | 0.44 (0.41 to 0.48) | 0.47 (0.38 to 0.55) |
| 2017 | 3.78 (3.44 to 4.12) | 1.15 (1.02 to 1.28) | 0.43 (0.4 to 0.46) | 0.41 (0.33 to 0.49) |
| 2018 | 3.24 (2.93 to 3.55) | 1.09 (0.96 to 1.21) | 0.41 (0.38 to 0.44) | 0.43 (0.35 to 0.52) |
| 2019 | 3.24 (2.94 to 3.54) | 0.99 (0.87 to 1.1) | 0.44 (0.4 to 0.47) | 0.41 (0.33 to 0.49) |
| 2020 | 3.81 (3.48 to 4.13) | 1.04 (0.92 to 1.16) | 0.42 (0.38 to 0.45) | 0.43 (0.35 to 0.51) |
| Overall | 4.04 (3.96 to 4.13) | 1.45 (1.41 to 1.48) | 0.55 (0.54 to 0.56) | 0.71 (0.69 to 0.74) |

**Supplemental Table 7: Hepatitis** B **-Related Age-Adjusted Mortality Rates per 100,000, Stratified by Census Region in the United States, 1999 to 2020**

| **Year** | **Age-Adjusted Rate (95% CI)** | | | |
| --- | --- | --- | --- | --- |
| **Northeast** | **Midwest** | **South** | **West** |
| 1999 | 1.06 (0.96 to 1.17) | 0.62 (0.54 to 0.7) | 1.18 (1.1 to 1.27) | 1.58 (1.45 to 1.7) |
| 2000 | 0.98 (0.88 to 1.08) | 0.59 (0.51 to 0.66) | 1.08 (1 to 1.16) | 1.52 (1.39 to 1.64) |
| 2001 | 1.02 (0.92 to 1.13) | 0.59 (0.52 to 0.67) | 1 (0.92 to 1.07) | 1.42 (1.3 to 1.54) |
| 2002 | 1.1 (1 to 1.21) | 0.59 (0.52 to 0.66) | 1 (0.92 to 1.07) | 1.34 (1.23 to 1.45) |
| 2003 | 0.86 (0.77 to 0.95) | 0.51 (0.44 to 0.58) | 0.91 (0.84 to 0.99) | 1.29 (1.18 to 1.4) |
| 2004 | 0.88 (0.78 to 0.97) | 0.48 (0.41 to 0.54) | 0.84 (0.78 to 0.91) | 1.23 (1.12 to 1.34) |
| 2005 | 0.79 (0.7 to 0.88) | 0.51 (0.44 to 0.57) | 0.91 (0.84 to 0.98) | 1.24 (1.13 to 1.34) |
| 2006 | 0.75 (0.67 to 0.84) | 0.54 (0.47 to 0.61) | 0.82 (0.76 to 0.89) | 1.28 (1.17 to 1.38) |
| 2007 | 0.86 (0.77 to 0.96) | 0.56 (0.49 to 0.63) | 0.84 (0.78 to 0.91) | 1.26 (1.16 to 1.37) |
| 2008 | 0.8 (0.71 to 0.89) | 0.52 (0.46 to 0.59) | 0.82 (0.76 to 0.88) | 1.2 (1.1 to 1.3) |
| 2009 | 0.71 (0.63 to 0.79) | 0.45 (0.39 to 0.51) | 0.69 (0.63 to 0.74) | 1.28 (1.18 to 1.38) |
| 2010 | 0.83 (0.74 to 0.92) | 0.45 (0.39 to 0.51) | 0.78 (0.72 to 0.84) | 1.17 (1.07 to 1.27) |
| 2011 | 0.77 (0.68 to 0.86) | 0.48 (0.42 to 0.54) | 0.83 (0.77 to 0.89) | 1.1 (1 to 1.19) |
| 2012 | 0.68 (0.6 to 0.76) | 0.48 (0.42 to 0.54) | 0.73 (0.68 to 0.79) | 1.17 (1.08 to 1.27) |
| 2013 | 0.78 (0.7 to 0.87) | 0.53 (0.46 to 0.59) | 0.78 (0.72 to 0.84) | 1.12 (1.03 to 1.22) |
| 2014 | 0.72 (0.64 to 0.8) | 0.45 (0.39 to 0.51) | 0.76 (0.7 to 0.82) | 1.15 (1.06 to 1.24) |
| 2015 | 0.63 (0.55 to 0.7) | 0.46 (0.4 to 0.52) | 0.7 (0.65 to 0.76) | 1.01 (0.92 to 1.09) |
| 2016 | 0.61 (0.53 to 0.68) | 0.44 (0.38 to 0.5) | 0.72 (0.67 to 0.78) | 0.93 (0.85 to 1.01) |
| 2017 | 0.58 (0.51 to 0.65) | 0.45 (0.39 to 0.51) | 0.76 (0.7 to 0.82) | 0.92 (0.84 to 1) |
| 2018 | 0.55 (0.48 to 0.63) | 0.47 (0.41 to 0.53) | 0.71 (0.65 to 0.77) | 0.8 (0.73 to 0.87) |
| 2019 | 0.48 (0.42 to 0.55) | 0.41 (0.36 to 0.47) | 0.68 (0.63 to 0.73) | 0.91 (0.83 to 0.99) |
| 2020 | 0.52 (0.45 to 0.59) | 0.52 (0.45 to 0.58) | 0.68 (0.63 to 0.74) | 0.92 (0.85 to 1) |
| Overall | 0.77 (0.75 to 0.79) | 0.53 (0.51 to 0.54) | 0.83 (0.82 to 0.84) | 1.17 (1.15 to 1.19) |

**Supplemental Table 8: Hepatitis** B **-Related Age-Adjusted Mortality Rates per 100,000, Stratified by States in the United States, 1999 to 2020**

| **State** | **Age Adjusted Rate (95% CI)** |
| --- | --- |
| Alabama | 0.57 (0.51 to 0.62) |
| Alaska | 1.14 (0.91 to 1.37) |
| Arizona | 0.62 (0.57 to 0.67) |
| Arkansas | 0.86 (0.77 to 0.95) |
| California | 1.5 (1.46 to 1.53) |
| Colorado | 0.74 (0.68 to 0.81) |
| Connecticut | 0.58 (0.52 to 0.64) |
| Delaware | 0.7 (0.56 to 0.86) |
| District of Columbia | 2.44 (2.11 to 2.77) |
| Florida | 0.73 (0.7 to 0.76) |
| Georgia | 0.66 (0.62 to 0.71) |
| Hawaii | 1.95 (1.76 to 2.14) |
| Idaho | 0.38 (0.3 to 0.46) |
| Illinois | 0.39 (0.37 to 0.42) |
| Indiana | 0.47 (0.43 to 0.52) |
| Iowa | 0.51 (0.44 to 0.58) |
| Kansas | 0.54 (0.47 to 0.61) |
| Kentucky | 0.77 (0.71 to 0.84) |
| Louisiana | 1.14 (1.06 to 1.22) |
| Maine | 0.45 (0.36 to 0.53) |
| Maryland | 0.94 (0.88 to 1.01) |
| Massachusetts | 0.74 (0.68 to 0.79) |
| Michigan | 0.53 (0.49 to 0.57) |
| Minnesota | 0.65 (0.59 to 0.71) |
| Mississippi | 0.92 (0.83 to 1.01) |
| Missouri | 0.5 (0.45 to 0.55) |
| Montana | 0.32 (0.24 to 0.42) |
| Nebraska | 0.58 (0.48 to 0.67) |
| Nevada | 0.74 (0.66 to 0.83) |
| New Hampshire | 0.39 (0.3 to 0.48) |
| New Jersey | 0.7 (0.66 to 0.75) |
| New Mexico | 0.61 (0.52 to 0.7) |
| New York | 1.06 (1.02 to 1.1) |
| North Carolina | 0.67 (0.62 to 0.71) |
| North Dakota | 0.26 (0.16 to 0.38) |
| Ohio | 0.64 (0.6 to 0.67) |
| Oklahoma | 1.33 (1.23 to 1.42) |
| Oregon | 1.1 (1.02 to 1.18) |
| Pennsylvania | 0.52 (0.49 to 0.55) |
| Rhode Island | 1.21 (1.04 to 1.38) |
| South Carolina | 0.8 (0.73 to 0.87) |
| South Dakota | 0.27 (0.19 to 0.38) |
| Tennessee | 1.1 (1.03 to 1.17) |
| Texas | 0.93 (0.89 to 0.96) |
| Utah | 0.5 (0.42 to 0.58) |
| Vermont | 0.61 (0.47 to 0.79) |
| Virginia | 0.55 (0.51 to 0.59) |
| Washington | 1.11 (1.04 to 1.17) |
| West Virginia | 0.81 (0.71 to 0.92) |
| Wisconsin | 0.36 (0.32 to 0.39) |
| Wyoming | 0.47 (0.33 to 0.64) |
| Overall | 0.82 (0.81 to 0.83) |

**Supplemental Table 9: Hepatitis** B **- Related Age-Adjusted Mortality Rates per 100,000 in the United States, Stratified by Urban-Rural Classification, 1999 to 2020**

| **Year** | **Age Adjusted Rate (95% CI)** | |
| --- | --- | --- |
| **Metropolitan** | **Nonmetropolitan** |
| 1999 | 1.2 (1.14 to 1.26) | 0.69 (0.59 to 0.78) |
| 2000 | 1.12 (1.07 to 1.18) | 0.64 (0.55 to 0.73) |
| 2001 | 1.07 (1.02 to 1.12) | 0.65 (0.56 to 0.74) |
| 2002 | 1.09 (1.04 to 1.14) | 0.61 (0.52 to 0.7) |
| 2003 | 0.97 (0.92 to 1.02) | 0.61 (0.52 to 0.69) |
| 2004 | 0.94 (0.89 to 0.98) | 0.51 (0.43 to 0.59) |
| 2005 | 0.89 (0.84 to 0.93) | 0.67 (0.58 to 0.76) |
| 2006 | 0.88 (0.83 to 0.92) | 0.65 (0.56 to 0.74) |
| 2007 | 0.91 (0.86 to 0.95) | 0.56 (0.48 to 0.64) |
| 2008 | 0.89 (0.84 to 0.93) | 0.58 (0.5 to 0.67) |
| 2009 | 0.84 (0.8 to 0.88) | 0.48 (0.41 to 0.56) |
| 2010 | 0.87 (0.82 to 0.91) | 0.53 (0.45 to 0.61) |
| 2011 | 0.86 (0.81 to 0.9) | 0.58 (0.5 to 0.66) |
| 2012 | 0.81 (0.77 to 0.85) | 0.52 (0.44 to 0.59) |
| 2013 | 0.85 (0.81 to 0.89) | 0.61 (0.52 to 0.69) |
| 2014 | 0.81 (0.77 to 0.85) | 0.57 (0.49 to 0.65) |
| 2015 | 0.73 (0.69 to 0.77) | 0.6 (0.52 to 0.69) |
| 2016 | 0.72 (0.68 to 0.75) | 0.56 (0.48 to 0.64) |
| 2017 | 0.72 (0.69 to 0.76) | 0.57 (0.49 to 0.65) |
| 2018 | 0.7 (0.67 to 0.74) | 0.58 (0.5 to 0.67) |
| 2019 | 0.65 (0.61 to 0.68) | 0.62 (0.53 to 0.71) |
| 2020 | 0.68 (0.64 to 0.71) | 0.56 (0.48 to 0.64) |
| Overall | 0.84 (0.83 to 0.85) | 0.59 (0.57 to 0.61) |
